# Supplementary material for: Detection and characterization of ponatinib reactive metabolites by liquid chromatography tandem mass spectrometry and elucidation of bioactivation pathways
Source: Royal Society of Chemistry journal article supplement (doi:10.1039/c6ra09985h), 2016-01-01

Supplementary figures:

1- Product ion chromatogram of PNT

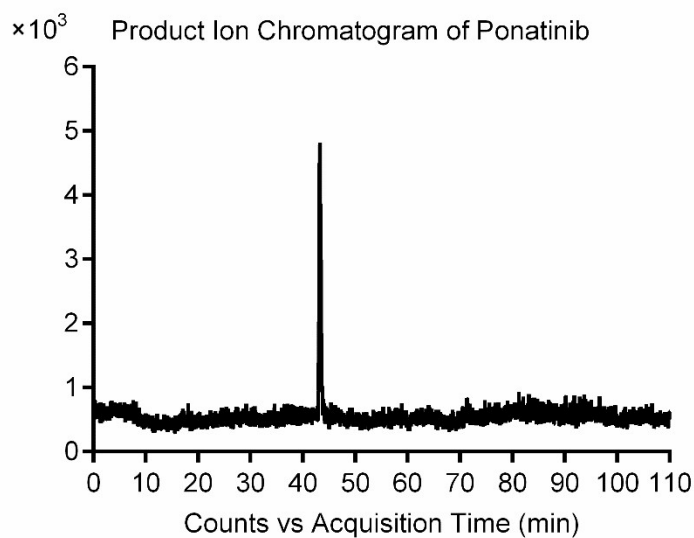

2- Product ion chromatogram of PNT519

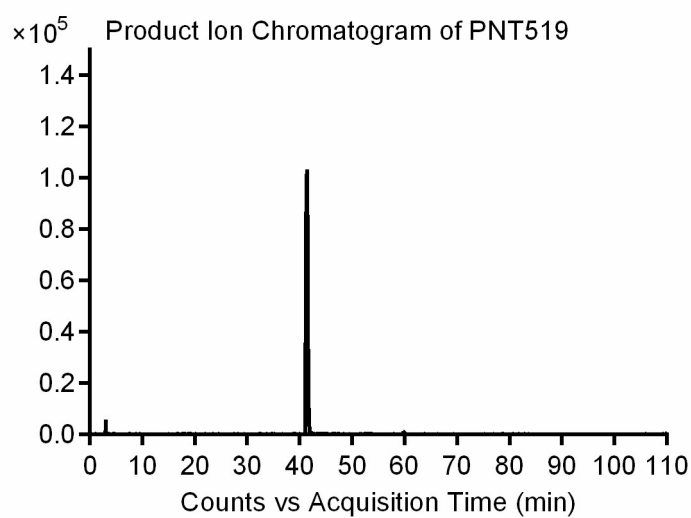

3- Product ion chromatogram of PNT535A- PNT535C.

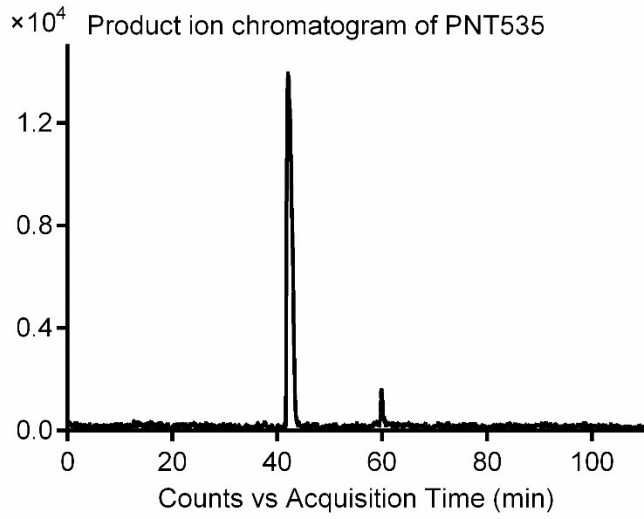

4- Product ion chromatogram of PNT549A- PNT549C

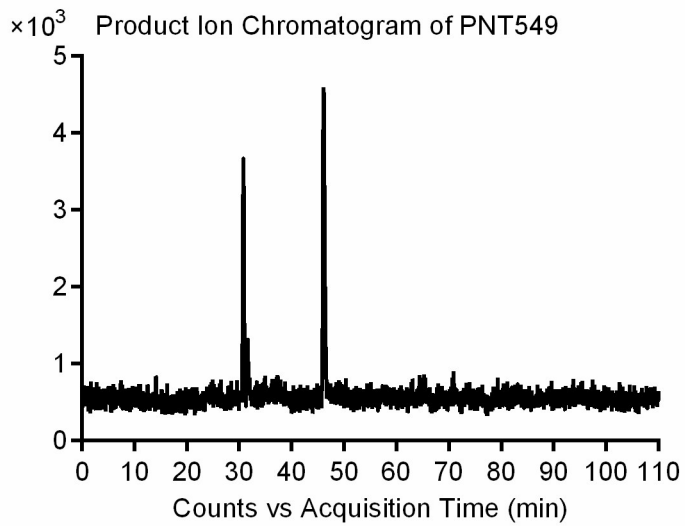

Supplement: c6ra09985h2.pdf [file c6ra09985h2.pdf]
