# Supplementary figures and images for: Detection and characterization of ponatinib reactive metabolites by liquid chromatography tandem mass spectrometry and elucidation of bioactivation pathways
Source: Royal Society of Chemistry journal article supplement (doi:10.1039/c6ra09985h), 2016-01-01

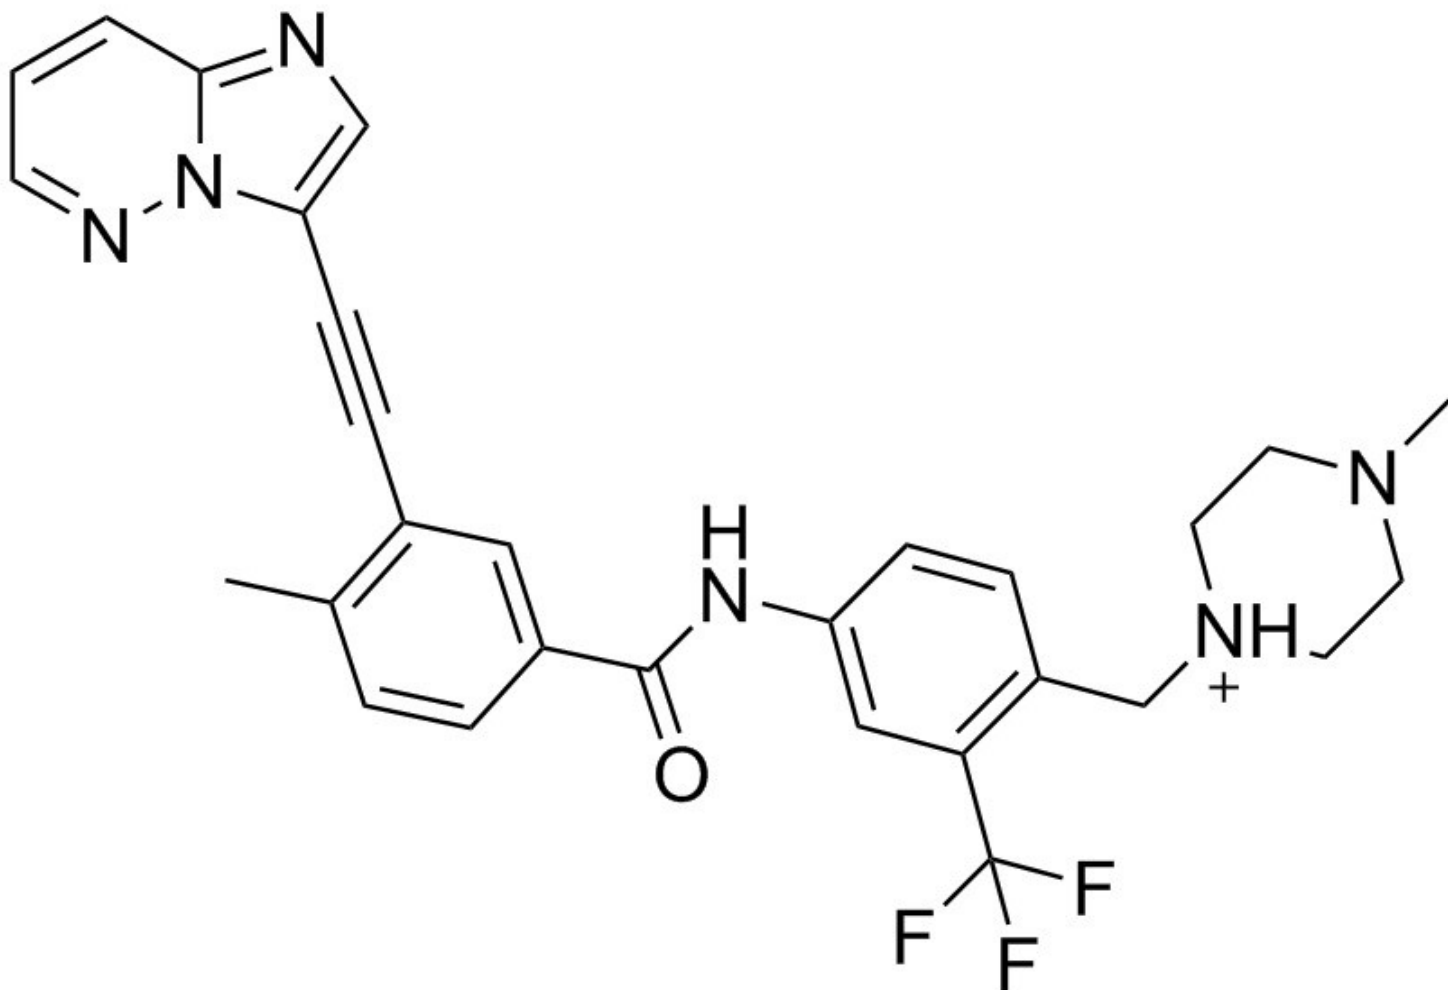

Ponatinib (m/z: 533)

Supplement: c6ra09985h1.pdf [file c6ra09985h1.pdf]
